# Supplementary material
Source: ML conference proceedings conference paper supplement (https://openaccess.thecvf.com/content/CVPR_2019/html/Zhi_Multispectral_Imaging_for_CVPR_2019_paper.html)
Supplement: Supplementary file 1 [file Zhi_Multispectral_Imaging_for_CVPR_2019_supplemental.pdf]

# Multispectral Imaging for Fine-Grained Recognition of Powders on Complex Backgrounds Supplementary Material

Tiancheng Zhi, Bernardo R. Pires, Martial Hebert and Srinivasa G. Narasimhan  
Carnegie Mellon University

{tzhi,bpires,hebert,srinivas}@cs.cmu.edu

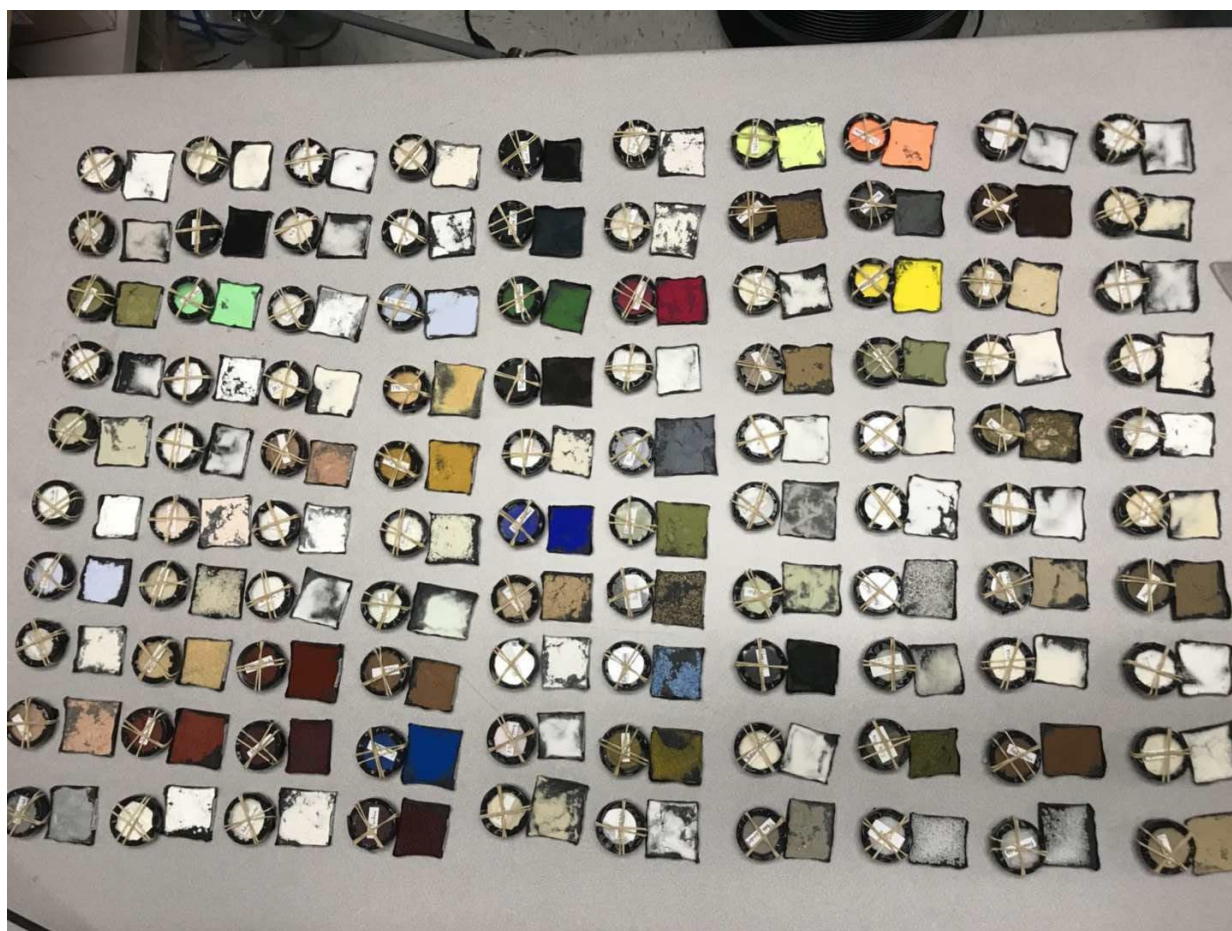

Figure 1. Thick and Thin Powder Samples.

## 1. Powder List

We collected 100 powders from 6 categories: Food (44 powders), Colorant (20), Skincare (10), Dust (10), Cleansing (9), and Other (7). See Table 1 for the list of powder names, categories, and legends for segmentation labels. See Figure 1 for snapshots of thick and thin powder samples.

## 2. Pseudocode for NNCV Band Selection

See Algorithm 1.

| Name                       | Category  | Legend | Name                  | Category  | Legend |
|----------------------------|-----------|--------|-----------------------|-----------|--------|
| 1 Ajinomoto                | Food      |        | 51 Green Bean Water   | Food      |        |
| 2 Almond Flour             | Food      |        | 52 Green Glow         | Colorant  |        |
| 3 Aqua Glow                | Colorant  |        | 53 Green Pigment      | Colorant  |        |
| 4 Aspirin                  | Other     |        | 54 Guar Gum           | Food      |        |
| 5 Baby Powder              | Skincare  |        | 55 Gym Chalk          | Dust      |        |
| 6 Baking Soda              | Food      |        | 56 Hibiscus           | Food      |        |
| 7 Barley Water             | Food      |        | 57 Iodized Salt       | Food      |        |
| 8 BB Powder                | Skincare  |        | 58 Loose Powder       | Skincare  |        |
| 9 Beach Sand               | Dust      |        | 59 Lotus              | Food      |        |
| 10 Blackboard Chalk        | Dust      |        | 60 Magenta Toner      | Colorant  |        |
| 11 Black Frit              | Dust      |        | 61 Matcha             | Food      |        |
| 12 Black Iron Oxide        | Colorant  |        | 62 MCT Oil            | Food      |        |
| 13 Black Pepper            | Food      |        | 63 Meringue           | Food      |        |
| 14 Black Toner             | Colorant  |        | 64 Milk Replacer      | Food      |        |
| 15 Blue Pigment            | Colorant  |        | 65 Moringa            | Food      |        |
| 16 Borax Detergent Booster | Cleansing |        | 66 Nail Dipping       | Colorant  |        |
| 17 Boric Acid              | Cleansing |        | 67 Onion              | Food      |        |
| 18 Bronze Metallic         | Colorant  |        | 68 Orange Glow        | Colorant  |        |
| 19 Brown Dye               | Colorant  |        | 69 Orange Peel        | Food      |        |
| 20 Brown Sugar             | Food      |        | 70 Pearl Powder       | Skincare  |        |
| 21 Calcium Carbonate       | Dust      |        | 71 Pet Moist          | Cleansing |        |
| 22 Cane Sugar              | Food      |        | 72 Potassium Iodide   | Other     |        |
| 23 Caralluma               | Food      |        | 73 Potato Starch      | Food      |        |
| 24 CC Powder               | Skincare  |        | 74 Quick Blue Bleach  | Cleansing |        |
| 25 Celtic Sea Salt         | Food      |        | 75 Red Bean Water     | Food      |        |
| 26 Charcoal                | Colorant  |        | 76 Root Destroyer     | Cleansing |        |
| 27 Chaste Tree Berry       | Food      |        | 77 Sandalwood         | Other     |        |
| 28 Chicken Bath            | Dust      |        | 78 Schorl Tourmaline  | Dust      |        |
| 29 Citric Acid             | Food      |        | 79 Shaving Powder     | Skincare  |        |
| 30 Cobalt Frit             | Dust      |        | 80 Silver Metallic    | Colorant  |        |
| 31 Cocoa                   | Food      |        | 81 Smelly Foot Powder | Cleansing |        |
| 32 Coconut Flour           | Food      |        | 82 Sodium Alginate    | Food      |        |
| 33 Coconut Oil             | Food      |        | 83 Spanish Paprika    | Food      |        |
| 34 Coffe Mate              | Food      |        | 84 Stain Remover      | Cleansing |        |
| 35 Corn Starch             | Food      |        | 85 Stevia             | Food      |        |
| 36 Cream of Rice           | Food      |        | 86 Stone Cement       | Dust      |        |
| 37 Cream of Tartar         | Food      |        | 87 Sun Powder         | Skincare  |        |
| 38 Cream of Wheat          | Food      |        | 88 Talcum             | Skincare  |        |
| 39 Cyan Toner              | Colorant  |        | 89 Teal Azul Dye      | Colorant  |        |
| 40 Detox Powder            | Dust      |        | 90 Tide Detergent     | Cleansing |        |
| 41 Dragon Blood            | Other     |        | 91 Urea               | Other     |        |
| 42 Dry Milk                | Food      |        | 92 Vanilla            | Food      |        |
| 43 Espresso                | Food      |        | 93 Vitamin C          | Food      |        |
| 44 Eye Shadow              | Skincare  |        | 94 Wheat Grass        | Food      |        |
| 45 Fake Moss               | Other     |        | 95 White Pepper       | Food      |        |
| 46 Flower Fuel             | Other     |        | 96 Yellow Dye         | Colorant  |        |
| 47 Fuchsia Dye             | Colorant  |        | 97 Yellow Glow        | Colorant  |        |
| 48 Fungicide               | Cleansing |        | 98 Yellow Pigment     | Colorant  |        |
| 49 Garlic                  | Food      |        | 99 Yellow Toner       | Colorant  |        |
| 50 Ginger                  | Food      |        | 100 Zinc Oxide        | Skincare  |        |

Table 1. **Powder List.** Powder names, categories, and legends for segmentation labels are listed.

---

**Algorithm 1** NNCV Band Selection

---

**Input:** Number of SWIR bands to be selected  $N_s$ **Output:** Selected SWIR bands  $B_s$ 

```
 $B_s \leftarrow \emptyset$   
 $B_n \leftarrow$  all SWIR bands  
for  $i = 1 : N_s$  do  
  for each  $b \in B_n$  do  
     $score_b \leftarrow$  mean class accuracy of nearest neighbor  
    cross validation using RGBN and  $B_s \cup \{b\}$  bands  
  end for  
   $b \leftarrow \operatorname{argmax}_{b \in B_n} score_b$   
   $B_s \leftarrow B_s \cup \{b\}$   
   $B_n \leftarrow B_n - \{b\}$   
end for
```

---

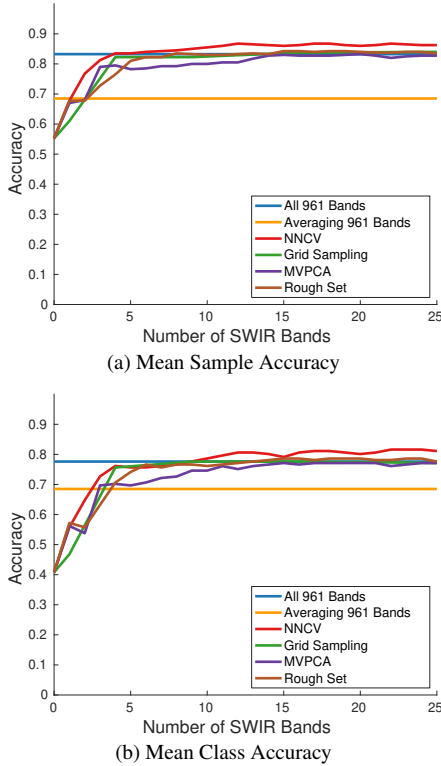

Figure 2. **Band Selection Comparison on an Additional Patch Dataset.** Mean sample accuracy calculates the mean accuracy of all samples (200 powder samples and 200 common material samples), while mean class accuracy calculates the mean accuracy of 101 classes (100 powder classes and 1 background class). NNCV performs better than the others in most settings.

### 3. Band Selection Comparison on Additional Patch Dataset

We captured an additional patch dataset (200 powder patches and 200 common material patches) under light

sources Set B. We classify a new patch by finding nearest neighbor in the patch dataset captured under Set A. The Split Cosine Distance between mean patch intensities is used. Figure 2 shows the accuracy vs. #SWIR bands curve of different selection methods. NNCV performs better than the others in most settings.

### 4. From Kubelka-Munk Model to Beer-Lambert Blending Model

The Beer-Lambert Blending model can be deduced from the Kubelka-Munk model [4] via approximation. The channel subscript  $c$  is ignored below.

Let  $R$ ,  $R_\infty$ , and  $R_g$  ( $0 < R, R_\infty, R_g < 1$ ) be the absolute reflectance of thin powder, infinitely thick powder, and background, and  $S$  be the scattering coefficient. The Kubelka-Munk model is:

$$R = \frac{R_\infty^{-1}(R_g - R_\infty) - R_\infty(R_g - R_\infty^{-1})e^{Sx(R_\infty^{-1} - R_\infty)}}{(R_g - R_\infty) - (R_g - R_\infty^{-1})e^{Sx(R_\infty^{-1} - R_\infty)}} \quad (1)$$

Let  $\kappa = S(R_\infty^{-1} - R_\infty)$ , Equation 1 can be re-written as:

$$R = \frac{(1 - R_\infty^2)(R_g - R_\infty)}{(R_\infty R_g - R_\infty^2) - (R_\infty R_g - 1)e^{\kappa x}} + R_\infty \quad (2)$$

Since  $0 < R_\infty, R_g < 1$ , we assume  $R_\infty^2$  and  $R_\infty R_g$  are small enough to be ignored. The approximate model is:

$$R = \frac{R_g - R_\infty}{e^{\kappa x}} + R_\infty = (1 - e^{-\kappa x})R_\infty + e^{-\kappa x}R_g \quad (3)$$

Under constant shading  $L$ ,  $I = LR$ ,  $A = LR_\infty$ ,  $B = LR_g$ . Then we obtain the Beer-Lambert Blending Model:

$$I_c = (1 - e^{-\kappa_c x})A_c + e^{-\kappa_c x}B_c \quad (4)$$

Since  $\kappa = S(R_\infty^{-1} - R_\infty)$ , it means that if  $S$  does not change much across channels, the  $\kappa$  signature and SWIR signature ( $\kappa$  and  $R_\infty$ ) should show negative correlation.

### 5. Calibrating $\kappa$ with Different Backgrounds

The Beer-Lambert Blending model assumes that the attenuation coefficient  $\kappa$  is independent of the background. This section checks if the calibrated  $\kappa$  is invariant to the background used for calibration.

We choose three different backgrounds (Black Aluminum Foil, Brown Leather Hide, Sand Paper) and image a thick sample, three thin samples, and three bare backgrounds in the same field of view for each powder. We calibrate  $\kappa$  values using different backgrounds. We calculate the coefficient of variation  $c_v$  (std/mean) for each powder and each channel. Usually the data is considered low variance if  $c_v < 1$ . Figure 3 shows the histogram of mean  $c_v$  values for RGBN and SWIR channels separately. About

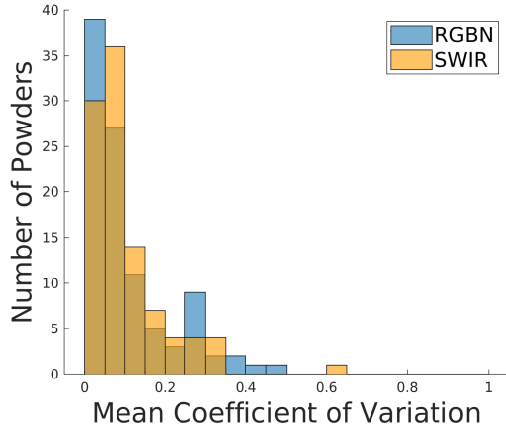

Figure 3. **Histogram of Coefficient of Variation  $c_v$  of  $\kappa$  Calibrated using Different Backgrounds.** Usually the data is considered low variance if  $c_v < 1$ . About 95% of the powders show  $c_v < 0.3$ , which means that  $\kappa$  calibrated with different backgrounds has a very low variance.

| Blending     | RMSE (mean $\pm$ std)             |                                   |
|--------------|-----------------------------------|-----------------------------------|
|              | RGBN                              | SWIR                              |
| Alpha        | 0.023 $\pm$ 0.021                 | 0.022 $\pm$ 0.024                 |
| Beer-Lambert | <b>0.014<math>\pm</math>0.016</b> | <b>0.012<math>\pm</math>0.018</b> |

Table 2. **Fitting error on Multi-background Dataset.** RMSE is calculated based on pixel values divided by white patch. Beer-Lambert Blending shows a smaller error than Alpha Blending.

95% of the powders show  $c_v < 0.3$ , which means that  $\kappa$  calibrated with different backgrounds has a very low variance.

We also calculate the fitting error on this multi-background dataset. As shown in Table 2, Beer-Lambert Blending has a smaller error than Alpha Blending.

## 6. Hyperparameters for Deep Learning

We use group normalization [6] instead of batch normalization [3] in DeepLab v3+ network [2]. CRF [1] post-processing is used.

We use the AdamWR [5] optimizer and cosine annealing with warm restart scheduler. We set initial restarting period= 8, and  $T_{mult} = 2$ . Thus, the scheduler restarts at 8, 24, 56, 120, and 248 epochs. We use batch size = 8 and weight decay =  $1e-4$  for all experiments.

We first train the model from scratch on synthetic powders against synthetic backgrounds with initial learning rate =  $1e-3$  for 248 epochs. In each iteration, we find a random synthetic background for the current powder mask, and blend them to render a scene. We call it an epoch when it goes through all powder masks once.

Then we fine-tune it on synthetic powders against real

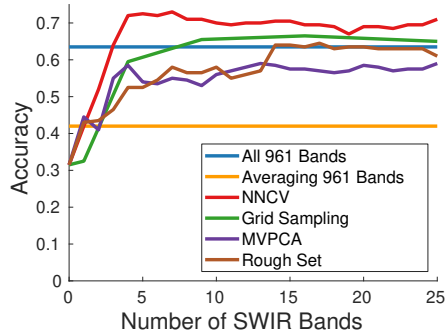

(a) Scene-val

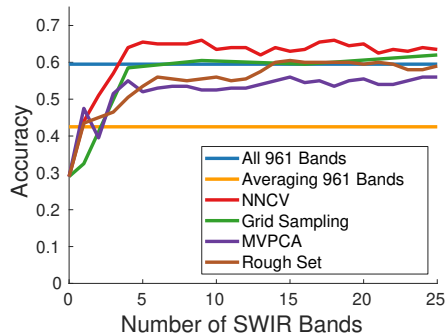

(b) Scene-test

Figure 4. **Band Selection Comparison.** Grid Sampling is tested on square numbers only. The accuracy of NNCV saturates after four bands, outperforming the other methods.

backgrounds from *Scene-bg* and *Scene-sl-train* with initial learning rate =  $1e-4$  for 56 epochs.

We finally fine-tune it on real powders against real backgrounds from *Scene-sl-train* with initial learning rate =  $5e-5$  for at most 56 epochs. Model selection is done according to performance on validation set.

## 7. More about Recognition with Known Powder Location

**Band Selection:** See Figure 4 for separate results on *Scene-val* and *Scene-test*.

**Confusion Matrix:** As shown in Figure 5, we visualized the confusion matrix of using inpainting background, Beer-Lambert Blending, and RGBN and 4 SWIR bands selected by NNCV. We show the confusion matrix for individual powders, and the one aggregated into 6 categories.

**Top-N Accuracy:** Top-N accuracy is meaningful for real applications. Table 3 show that top-3 predictions achieve over 80% accuracy and top-7 predictions achieve about 90% accuracy.

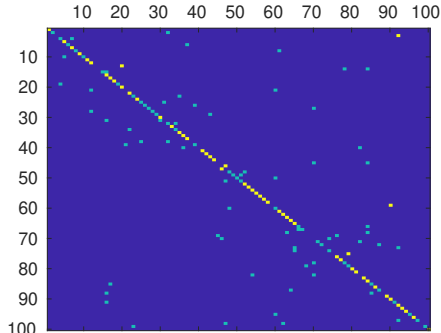

(a) 100 Powders

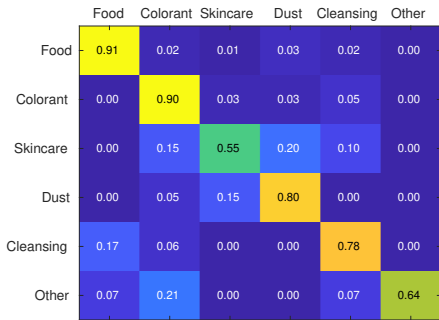

(b) Aggregated into 6 Categories

Figure 5. **Confusion Matrix.** The confusion matrix for individual powders, and the one aggregated into 6 categories are shown. The proposed method shows strong performance.

| Top-N | Scene-val | Scene-test | Scene-sl-train | Scene-sl-test |
|-------|-----------|------------|----------------|---------------|
| 1     | 72.0      | 64.0       | 62.50          | 62.50         |
| 3     | 81.0      | 86.0       | 82.00          | 83.50         |
| 5     | 87.0      | 88.5       | 87.25          | 87.75         |
| 7     | 90.0      | 92.5       | 89.50          | 90.75         |

Table 3. **Top-N Accuracy.** Inpainting background, Beer-Lambert Blending, RGBN channels and 4 SWIR bands selected by NNCV are used. Top-3 predictions achieve over 80% accuracy and top-7 predictions achieve about 90% accuracy.

## 8. More about Recognition with Unknown Powder Mask

**PR curve:** People usually care about whether there exists a specific powder in the image rather than the mask of the powder. We slightly modify the algorithm to answer this "Yes-or-No" question. We set a threshold of confidence, and check the confidence of being the specific powder for each pixel. We say "Yes" if there exists a pixel with confidence higher than the threshold. By adjusting the threshold, we plot the PR curve in Figure 8. The curve shows that our method significantly outperforms the baseline method.

**More Qualitative Results:** See Figure 7.

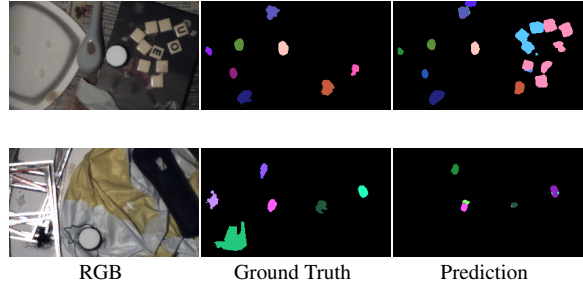

Figure 6. **Failure cases.** Row 1 misdetects small square objects; Row 2 misses powders on cluttered background.

**Failure Cases:** Figure 6 shows failure cases where the algorithm misdetects some small objects as powder, and misses some powders on cluttered background.

## 9. Spectral Specifications

**White Patch:** The white patch has a 98% reflectance with a approximately flat spectral curve in 400-1700nm. We divide the scene by the white patch intensity.

**Light Source:** The light sources are halogen and incandescent lamps made by 6 different manufacturers. Experiments show that our method works across different sources

**Mirror/Beamsplitter:** See Figure 9 for spectral specifications. The mirror has  $> 70\%$  reflectance in 400-1700nm. Beamsplitter 1 transmits SWIR while reflects VIS and NIR. Beamsplitter 2 has transmittance:reflectance=50:50 in VIS-NIR range.

**Theoretical SWIR Spectral Transmittance:** Figure 10 shows the theoretical spectral transmittance of different voltage settings (step size=0.6V).

## References

- [1] Liang-Chieh Chen, George Papandreou, Iasonas Kokkinos, Kevin Murphy, and Alan L Yuille. Deeplab: Semantic image segmentation with deep convolutional nets, atrous convolution, and fully connected crfs. *IEEE transactions on pattern analysis and machine intelligence*, 40(4):834–848, 2018. 4
- [2] Liang-Chieh Chen, Yukun Zhu, George Papandreou, Florian Schroff, and Hartwig Adam. Encoder-decoder with atrous separable convolution for semantic image segmentation. In *European Conference on Computer Vision*. Springer, 2018. 4
- [3] Sergey Ioffe and Christian Szegedy. Batch normalization: Accelerating deep network training by reducing internal covariate shift. In *International Conference on Machine Learning*, pages 448–456, 2015. 4
- [4] Paul Kubelka and Franz Munk. An article on optics of paint layers. *Z. Tech. Phys*, 12(593-601), 1931. 3
- [5] Ilya Loshchilov and Frank Hutter. Decoupled weight decay regularization. In *International Conference on Learning Representations*, 2019. 4
- [6] Yuxin Wu and Kaiming He. Group normalization. In *European Conference on Computer Vision*. Springer, 2018. 4

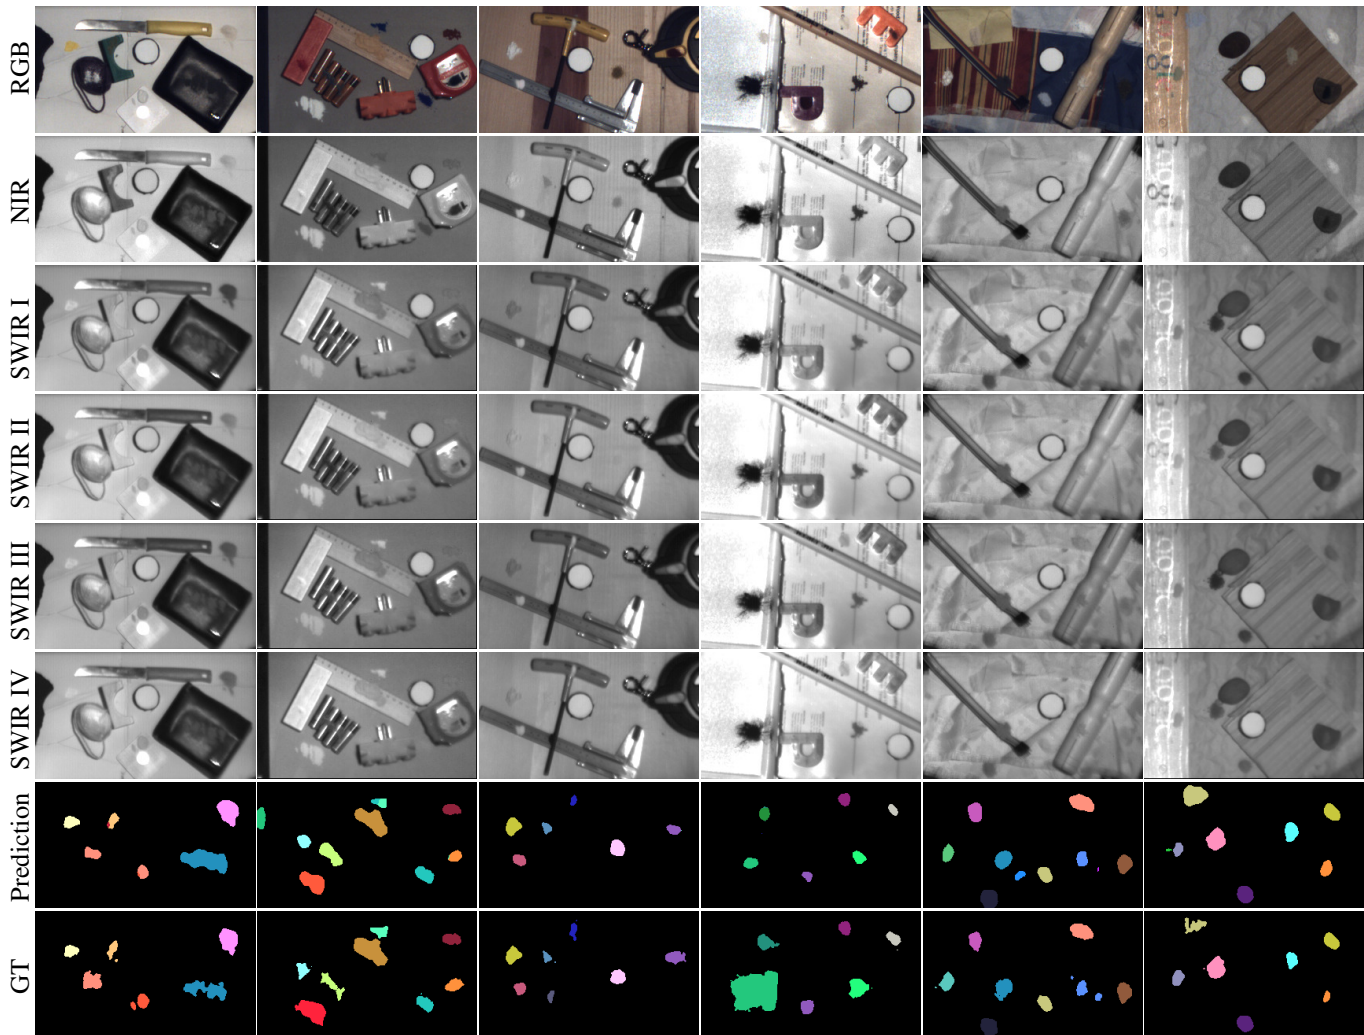

Figure 7. **More Qualitative Results.** Some images are from *Scene-sl-test*, which only has selected bands. But the two baseline methods (Per-pixel Nearest Neighbor and Standard Semantic Segmentation) require all bands. So the baseline results are not shown.

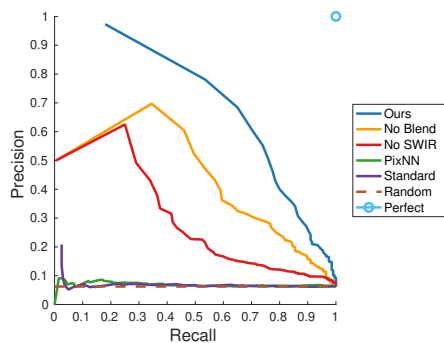

Figure 8. **PR curve on *Scene-test*.** Incorporating band selection and data synthesis, our method outperforms Per-pixel Nearest Neighbor, and achieves huge improvement over simply training on limited real data with all bands.

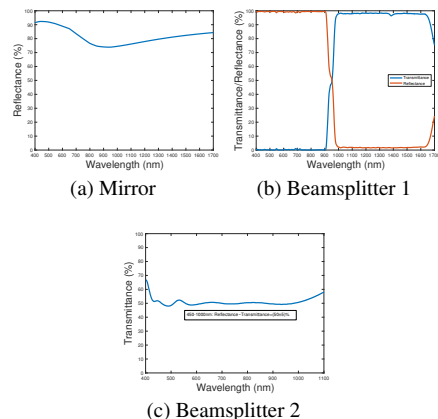

Figure 9. **Spectral Specifications of Mirror/Beamsplitters.**

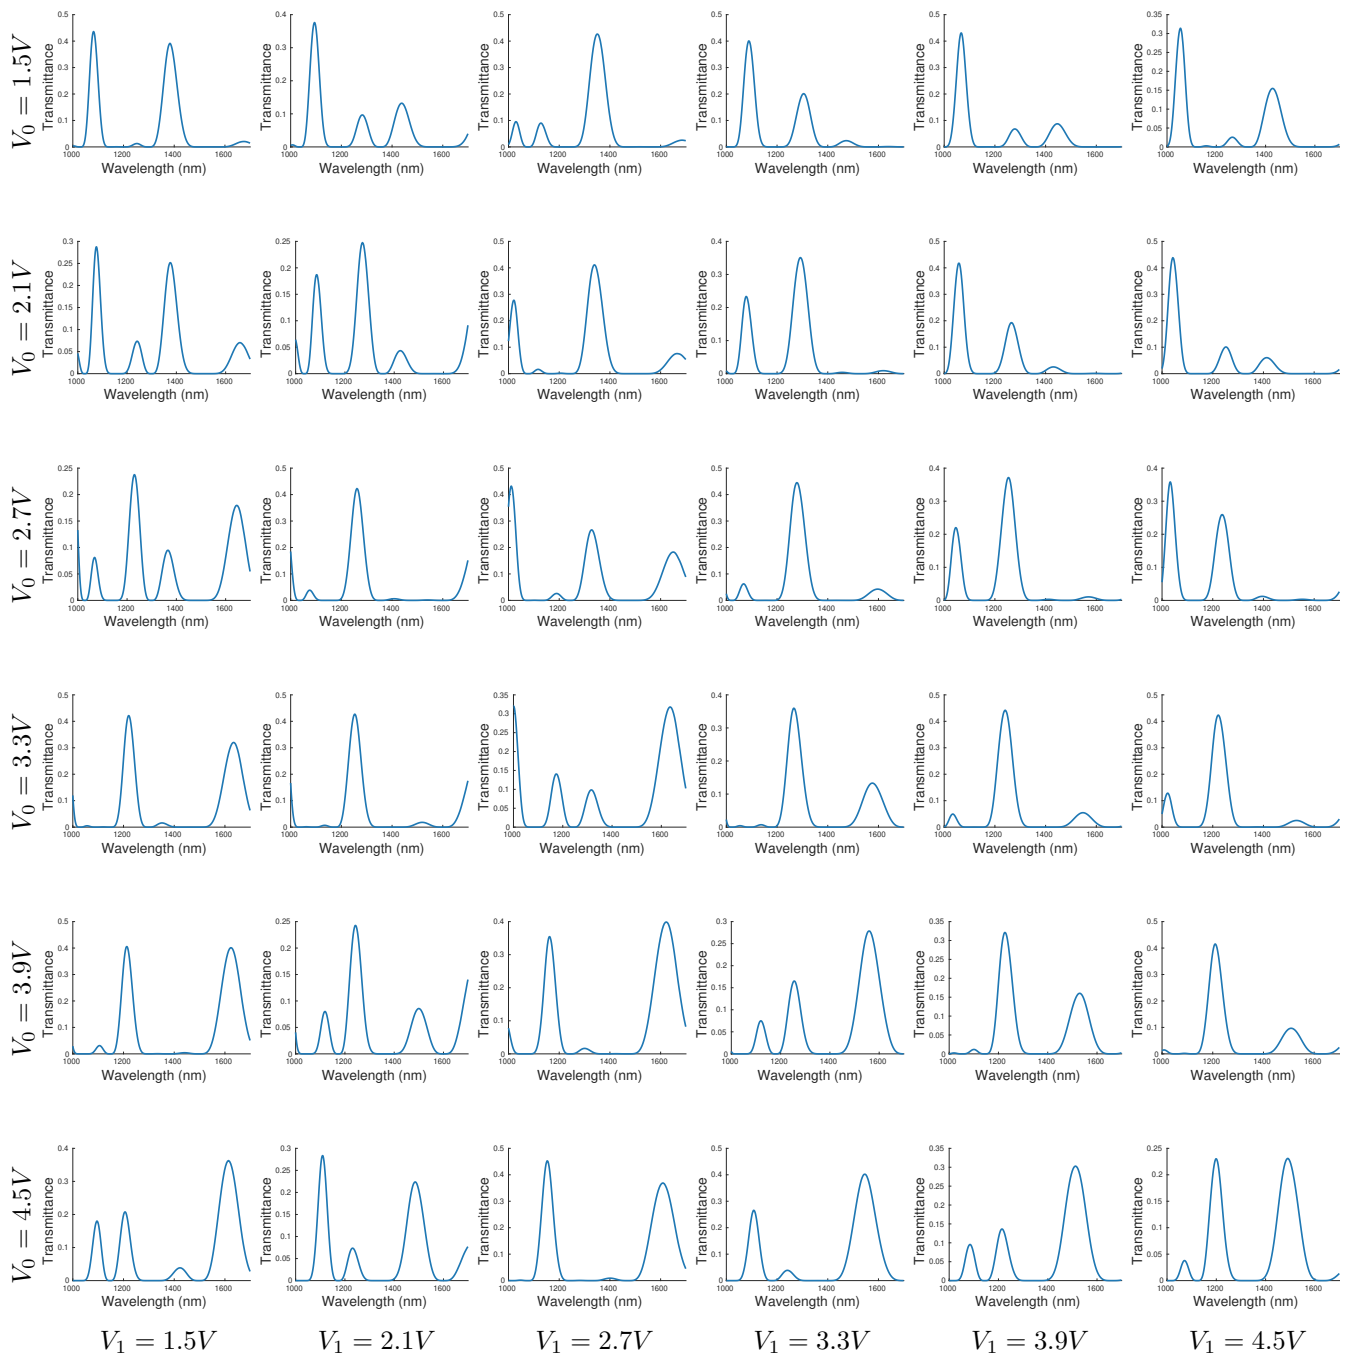

Figure 10. Theoretical SWIR spectral transmittance of different voltage settings.
